# Supplementary material for: In situ growth of octa-phenyl polyhedral oligomeric silsesquioxane nanocages over fluorinated graphene nanosheets: super-wetting coatings for oil and organic sorption
Source: Royal Society of Chemistry journal article supplement (doi:10.1039/d4dt02678k), 2024-11-20
Supplement: d4dt02678k1.pdf [file d4dt02678k1.pdf]

## Electronic Supplementary Information

### ***In Situ* growth of octa-phenyl polyhedral oligomeric silsesquioxane nanocages over fluorinated graphene nanosheets: super-wetting coatings for oil and organic Sorption**

Pushparaj Loganathan,<sup>a,c</sup> Ravi Yogapriya,<sup>b</sup> Arunkumar Chinnusamy,<sup>a</sup> K. K. R. Datta,<sup>b\*</sup> Swaminathan Shanmugan<sup>a\*</sup>

<sup>a</sup>Department of Chemistry, Faculty of Engineering and Technology, SRM Institute of Science and Technology, Kattankulathur-603203, Tamil Nadu, India,

<sup>b</sup>Functional Nanomaterials Laboratory, Department of Chemistry, Faculty of Engineering and Technology, SRM Institute of Science and Technology, Kattankulathur-603203, Tamil Nadu, India

<sup>c</sup>Department of Chemistry, Christ University, Bengaluru, Karnataka 560029, India

Corresponding authors: K. K. R. Datta ([kumarard@srmist.edu.in](mailto:kumarard@srmist.edu.in), [kkrdatta@gmail.com](mailto:kkrdatta@gmail.com)), Swaminathan Shanmugan ([shanmugs2@srmist.edu.in](mailto:shanmugs2@srmist.edu.in), [shanmugan0408@gmail.com](mailto:shanmugan0408@gmail.com))

## Contents

**Figure S1.** (a)  $N_2$  Isotherm at 77 K for O-Ph-POSS-FG and (b) corresponding pore size distribution.

**Figure S2.** Surface topographies of O-Ph-POSS-FG material determined by AFM.

**Figure S3.** Photograph of (a) Commercial PU sponge and (b) O-Ph-POSS-FG@Sponge.

**Table S1** Density and porosities of both pristine sponge as well as O-Ph-POSS-FG@sponges (4 units)

**Figure S4.** Water contact angle (WCA) of O-Ph-POSS-FG@Sponge.

**Figure S5.** WCA measurements of (a) 1 year old O-Ph-POSS-FG@Sponge and (b) 1 week old O-Ph-POSS-FG@Sponge.

**Figure S6.** Mechanical properties of O-Ph-POSS-FG@Sponge in different conditions followed by the evaluation of WCA.

**Figure S7.** Photograph of (a) PU sponge in water and (b) O-Ph-POSS-FG@Sponge on water.

**Figure S8.** FT-IR spectra of untreated O-Ph-POSS-FG@Sponge and recycled O-Ph-POSS-FG@Sponge after (a) Hexane, (b) Chloroform (c) Toluene and (d) cyclohexane sorption respectively.

**Figure S9.** Flux recovery ratio (FRR) and irreversible fouling ratio (RIR) of O-Ph-POSS-FG@Sponge for oil absorption.

**Figure S10.** (a) Pump oil reusability test using O-Ph-POSS-FG@Sponge; (b) Oil separation from water mixture using O-Ph-POSS-FG@Sponge.

**Figure S11.** O-Ph-POSS-FG in (a) Acid (2 M) and (b) Base media (2 M).

**Figure S12.** O-Ph-POSS-FG@Sponge (a) Acid (2 M) and (b) Base media (2 M).

**Figure S13.** FE-SEM images of (a) Acid treated O-Ph-POSS-FG@Sponge and (b) Base treated O-Ph-POSS-FG@Sponge.

**Figure S14.** Photographs showing the floatability behaviour of O-Ph-POSS-FG@Sponge (a) acidic, (b) alkaline, (c) sea water and (d) normal water.

**Figure S15.** Toluene/water separation (a) supercool condition at  $-40\text{ }^\circ\text{C}$  and (b) superheat condition at  $100\text{ }^\circ\text{C}$ .

**Table S2.** Hydrophobicity, absorption capacities, and separation efficiency of various POSS and 2D-based hydrophobic materials comparison with present work.

Supplementary Movies Video S1 and S2

**References**

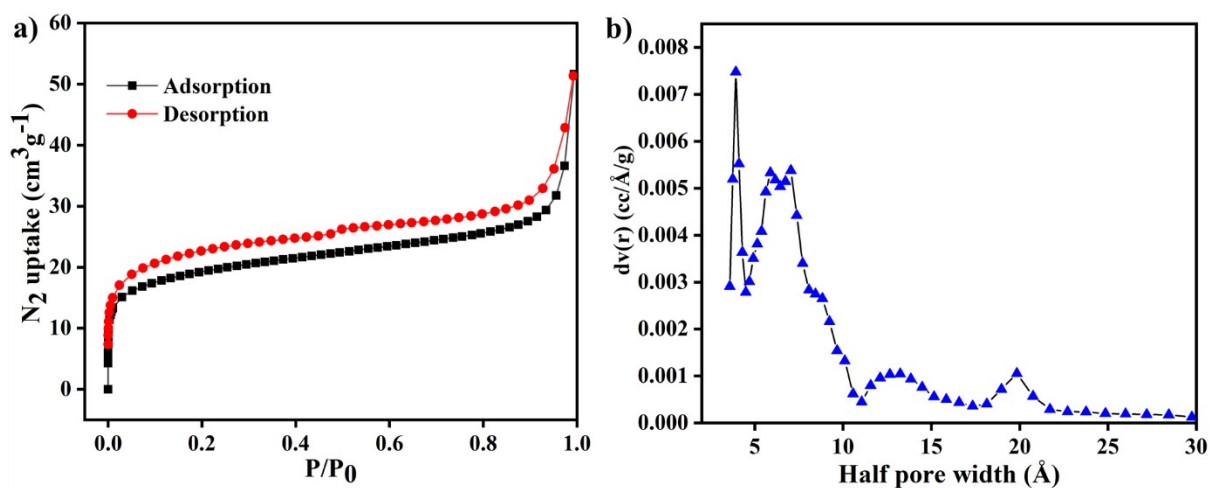

**Figure S1.** (a)  $N_2$  isotherms at 77 K for O-Ph-POSS-FG and (b) corresponding pore size distribution.

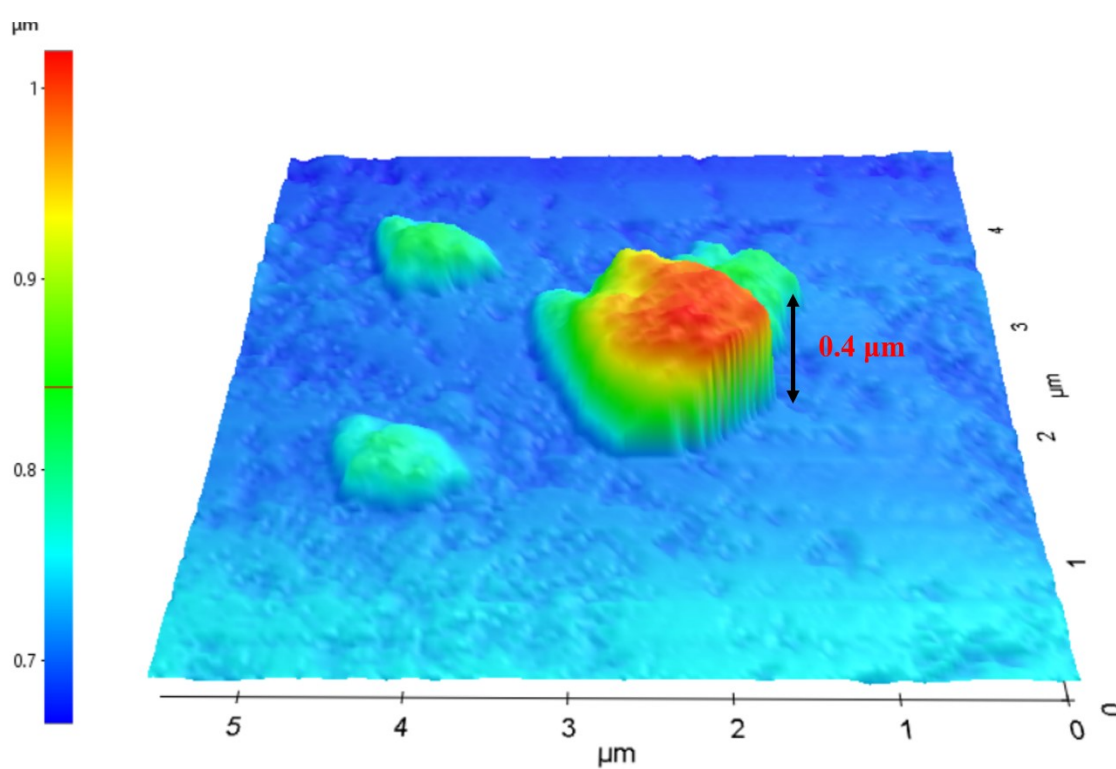

**Figure S2.** Surface topographies of O-Ph-POSS-FG material determined by AFM.

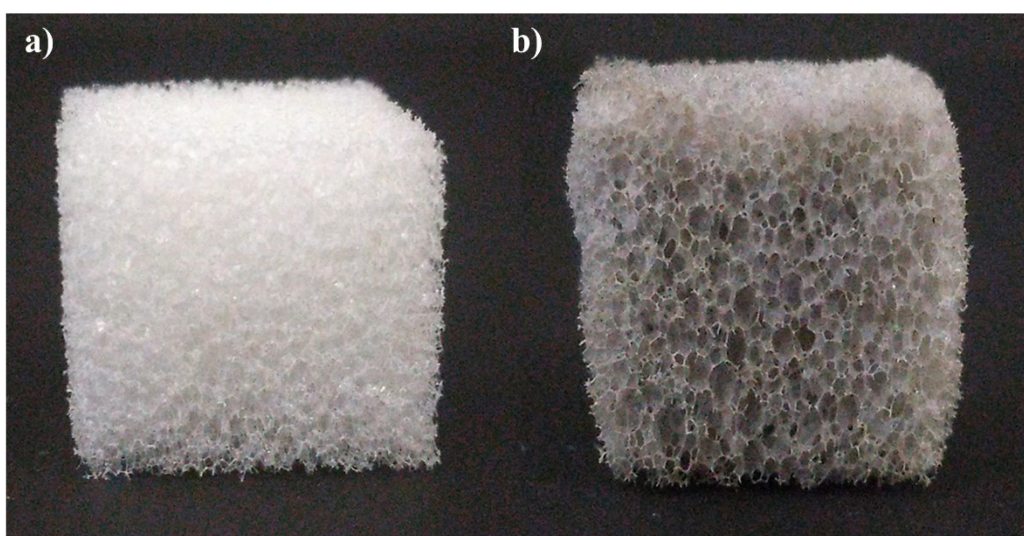

**Figure S3.** Photograph of (a) Commercial PU sponge and (b) O-Ph-POSS-FG@Sponge.

**Table S1.** Density and porosities of both pristine sponge as well as O-Ph-POSS-FG@sponges (4 units)

|                       | Density                  | Porosity |
|-----------------------|--------------------------|----------|
| Uncoated Sponge       | 0.0601 g/cm <sup>3</sup> | 99%      |
| O-Ph-POSS-FG@Sponge-1 | 0.08 g/cm <sup>3</sup>   | 98.67%   |
| O-Ph-POSS-FG@Sponge-2 | 0.078 g/cm <sup>3</sup>  | 98.70%   |
| O-Ph-POSS-FG@Sponge-3 | 0.079 g/cm <sup>3</sup>  | 98.69%   |
| O-Ph-POSS-FG@Sponge-4 | 0.076 g/cm <sup>3</sup>  | 98.74%   |

Apparent densities were calculated by measuring their masses and dimensions. The porosity was calculated using the following equations.<sup>1</sup>

$$Porosity = (1 - \rho/\rho_s) \times 100\%$$

where  $\rho$  is the bulk density of the sponges and  $\rho_s$  is the density of raw material sponge.

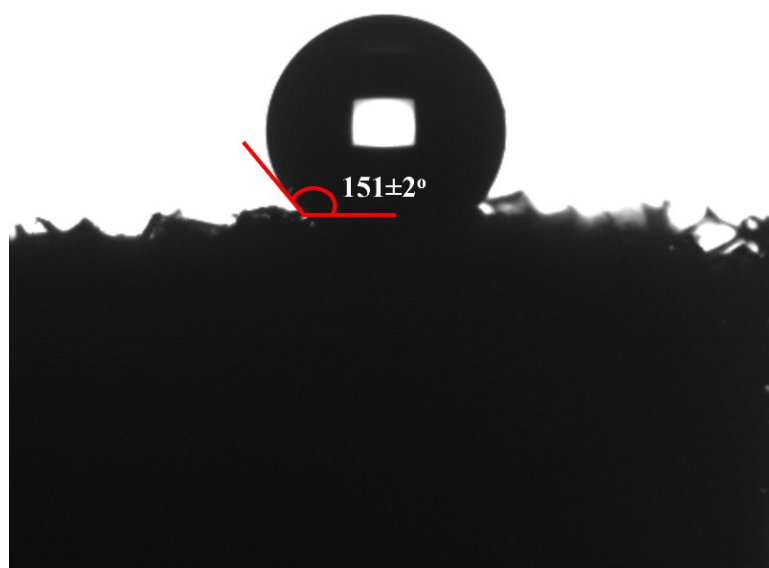

**Figure S4.** Water contact angle of O-Ph-POSS-FG@Sponge.

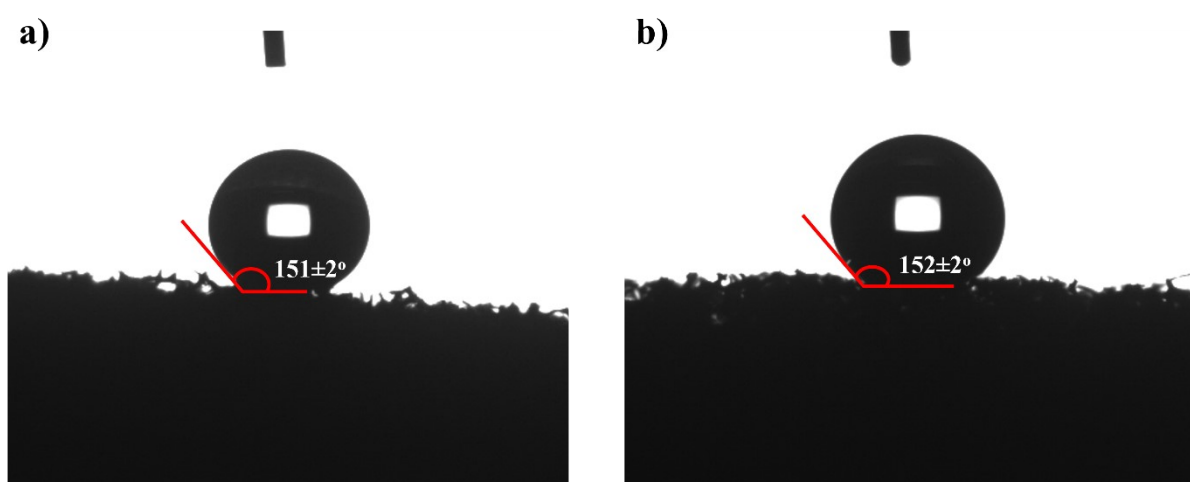

**Figure S5.** WCA measurements of (a) 1 year old O-Ph-POSS-FG@Sponge and (b) 1 week old O-Ph-POSS-FG@Sponge.



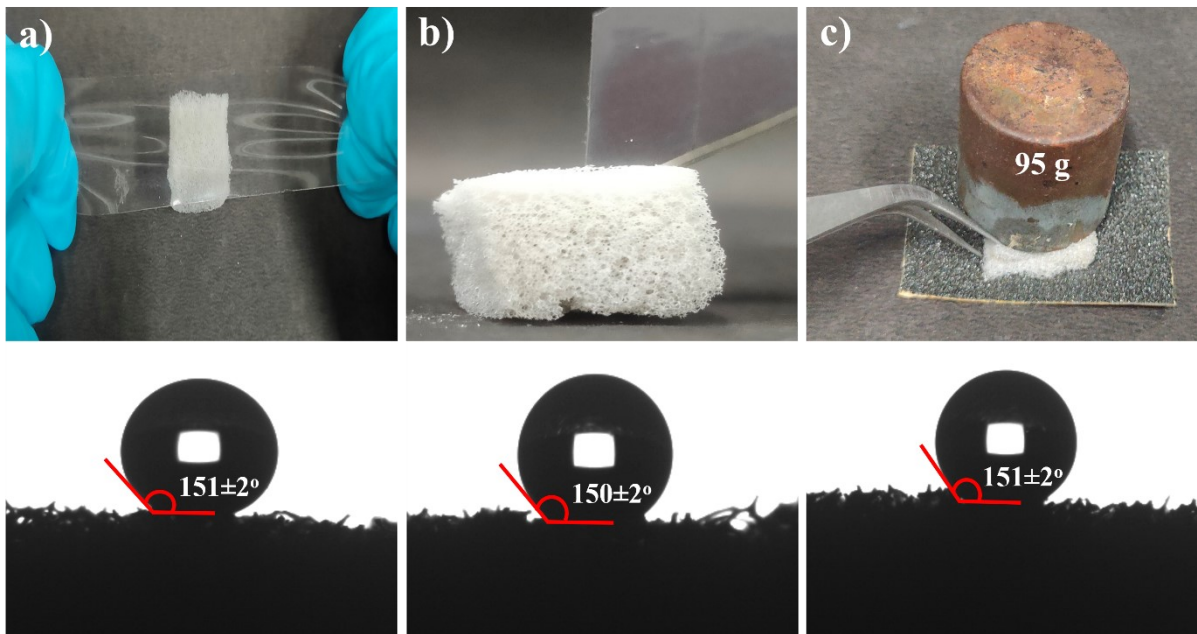

**Figure S6.** Mechanical properties of O-Ph-POSS-FG@Sponge in different conditions followed by the evaluation of WCA.

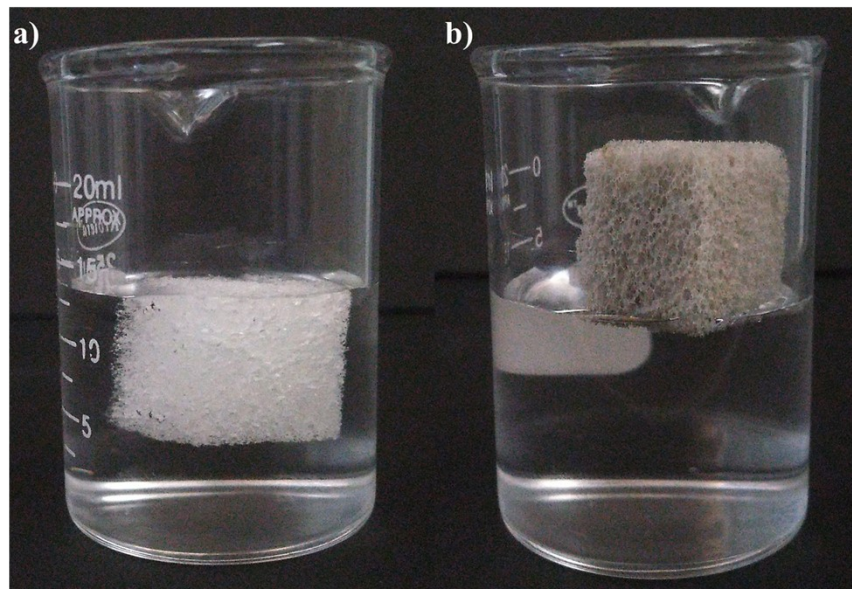

**Figure S7.** Photograph of (a) PU sponge in water and (b) O-Ph-POSS-FG@Sponge on water.

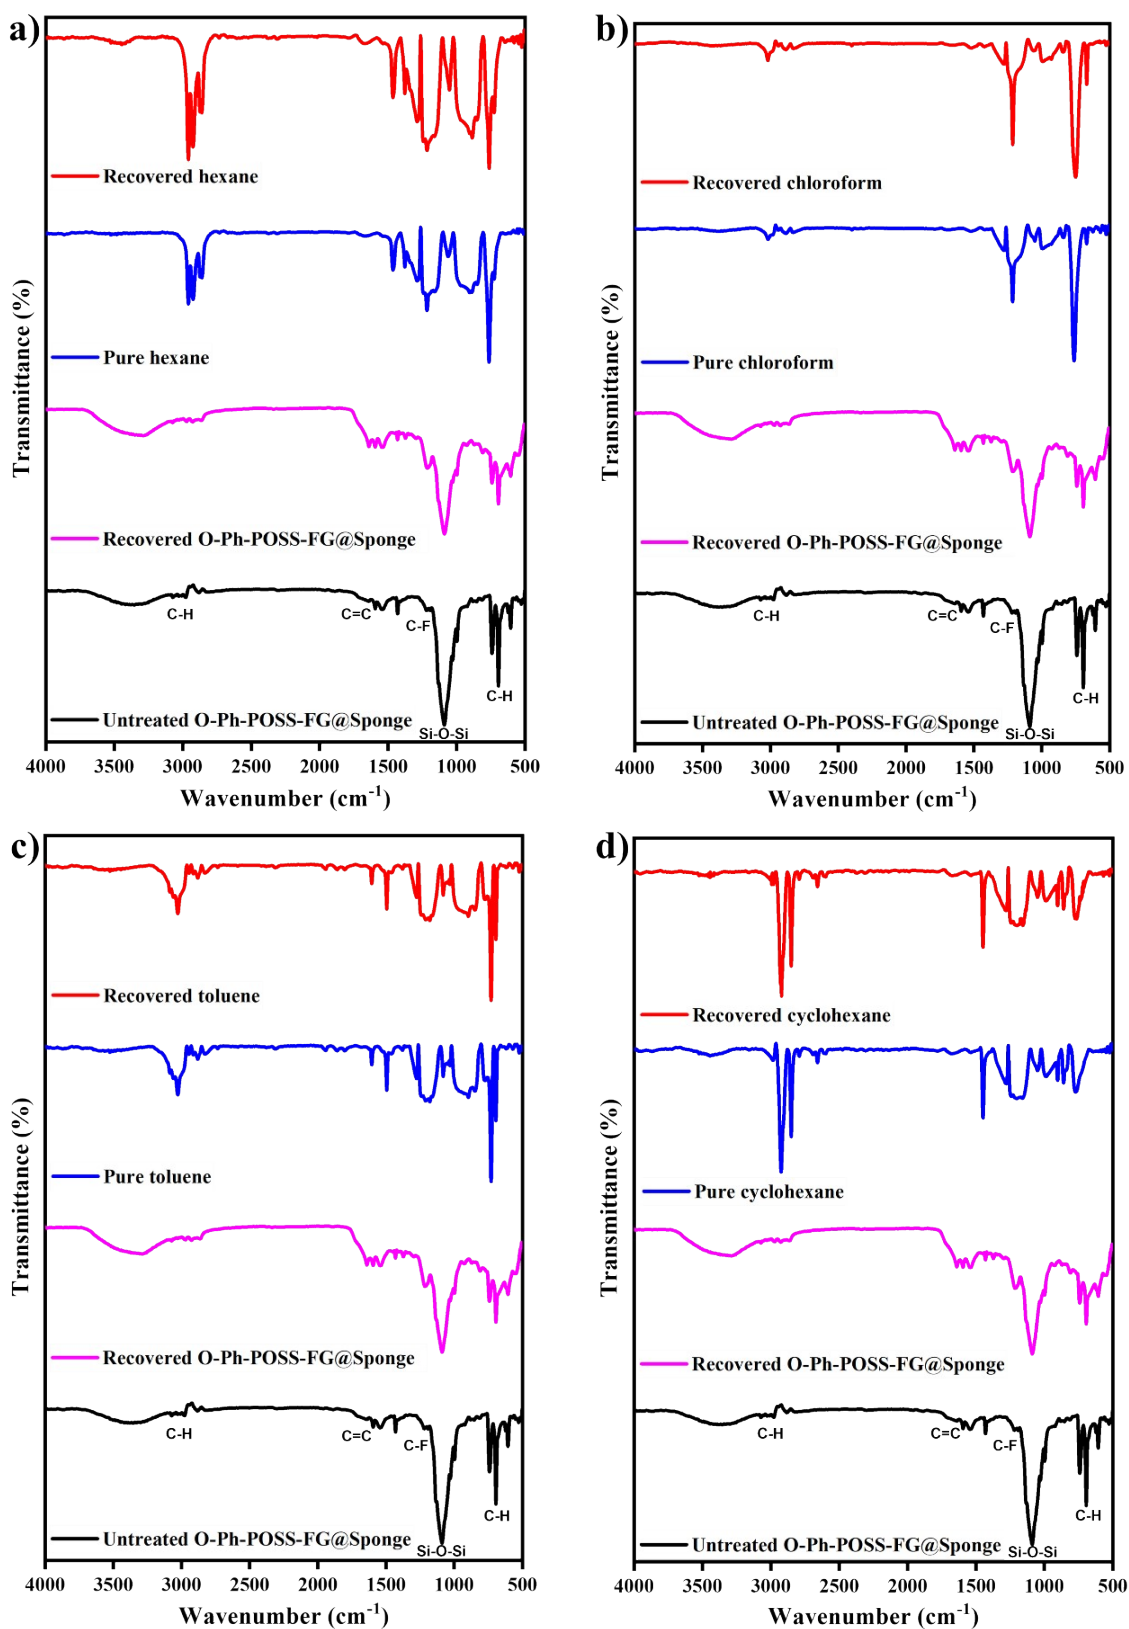

**Figure S8.** FT-IR spectra of untreated O-Ph-POSS-FG@Sponge and recycled O-Ph-POSS-FG@Sponge after (a) Hexane, (b) Chloroform (c) Toluene and (d) cyclohexane sorption respectively.

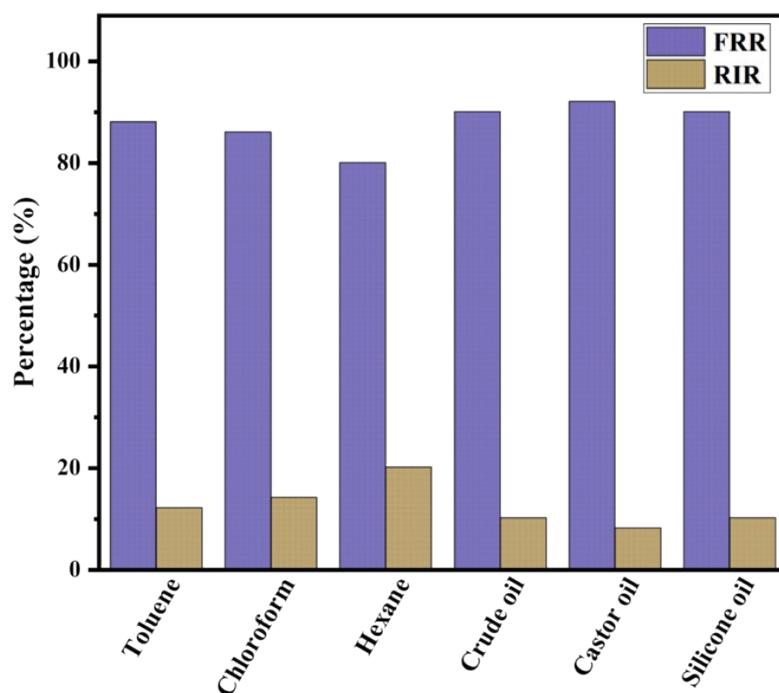

**Figure S9.** Flux recovery ratio (FRR) and irreversible fouling ratio (RIR) of O-Ph-POSS-FG@Sponge for oil absorption.

The anti-oil fouling property of the O-Ph-POSS-FG@Sponge was evaluated by two indexes of the flux recovery ratio (FRR) and irreversible fouling ratio (RIR). In general, FRR means that the variation of absorption capacity of sponges before and after use. The RIR indicate the changing rate of absorption capacity of sponges.<sup>1</sup>

which were calculated by the formula

$$\text{FRR} = (J_{w2}/J_{w1}) \times 100\%$$

$$\text{RIR} = [ (J_{w1} - J_{w2}) / J_{w1} ] \times 100\%$$

where  $J_{w1}$  is original absorption capacity and  $J_{w2}$  is last absorption capacity after desorption.



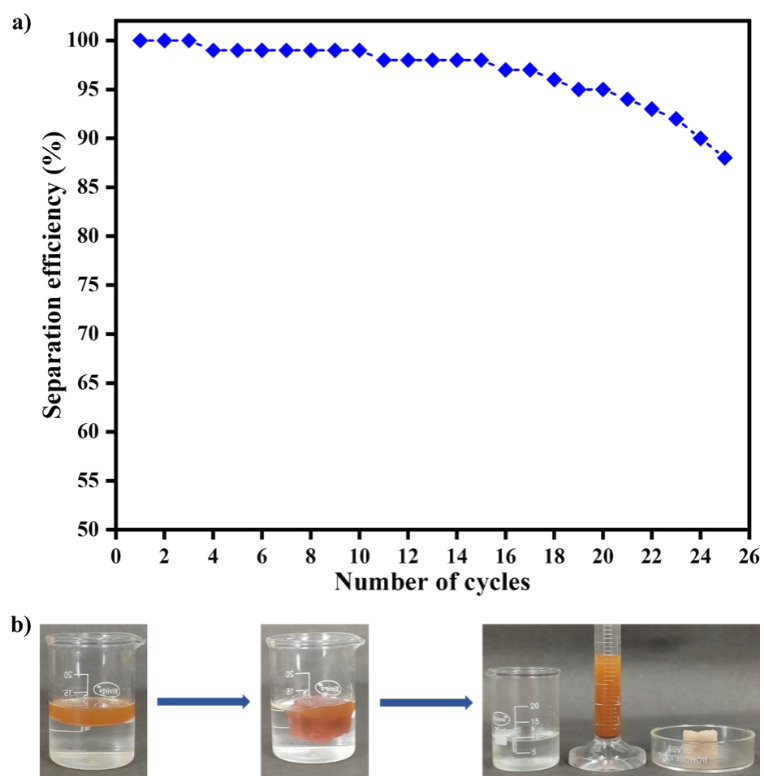

**Figure S10.** (a) Pump oil reusability test using O-Ph-POSS-FG@Sponge; (b) Oil separation from water mixture using O-Ph-POSS-FG@Sponge.

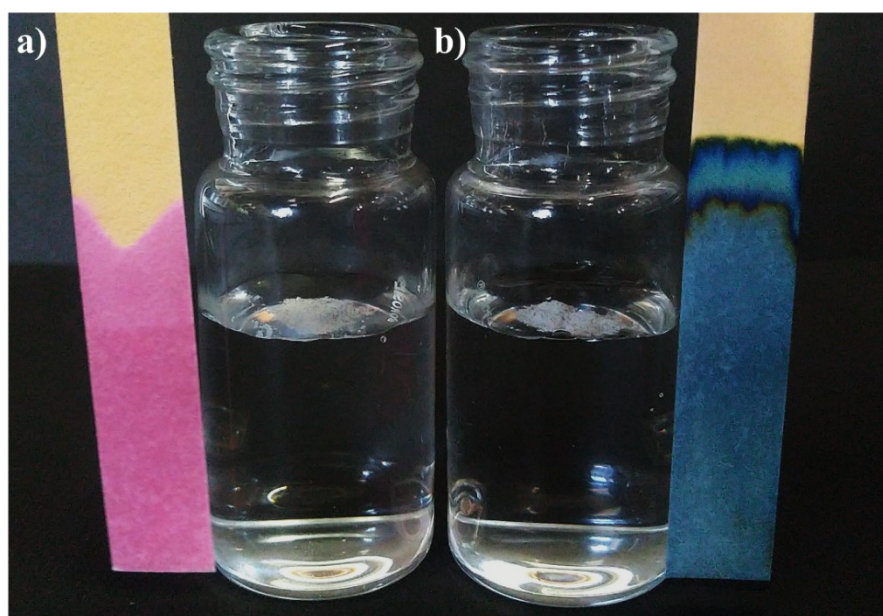

**Figure S11.** O-Ph-POSS-FG in (a) Acidic (2 M) and (b) Alkaline media (2 M).

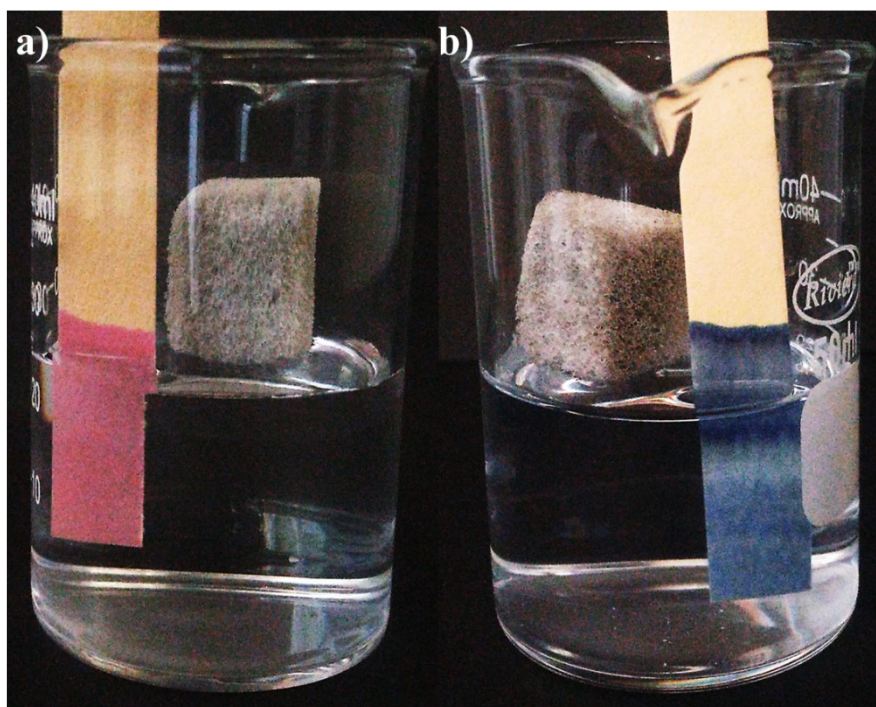

**Figure S12.** O-Ph-POSS-FG@Sponge (a) Acidic (2 M) and (b) Alkaline media (2 M).

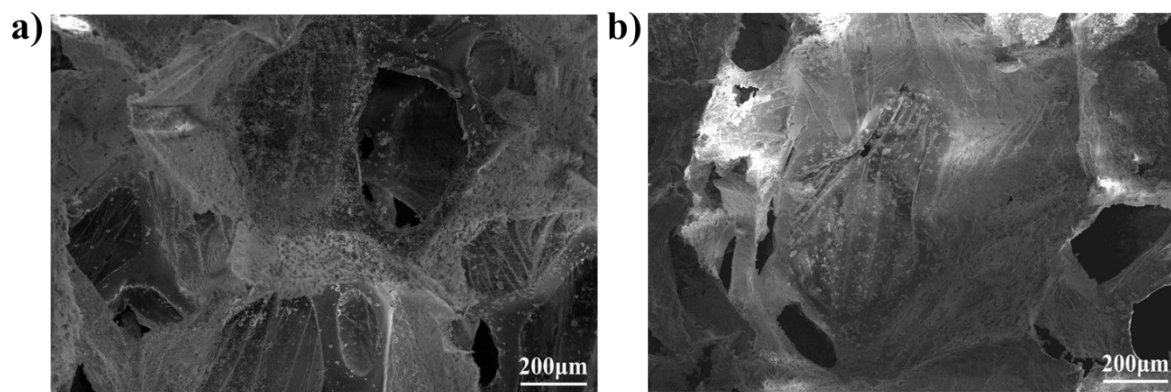

**Figure S13.** FE-SEM images of (a) Acid treated O-Ph-POSS-FG@Sponge and (b) Alkaline treated O-Ph-POSS-FG@Sponge.

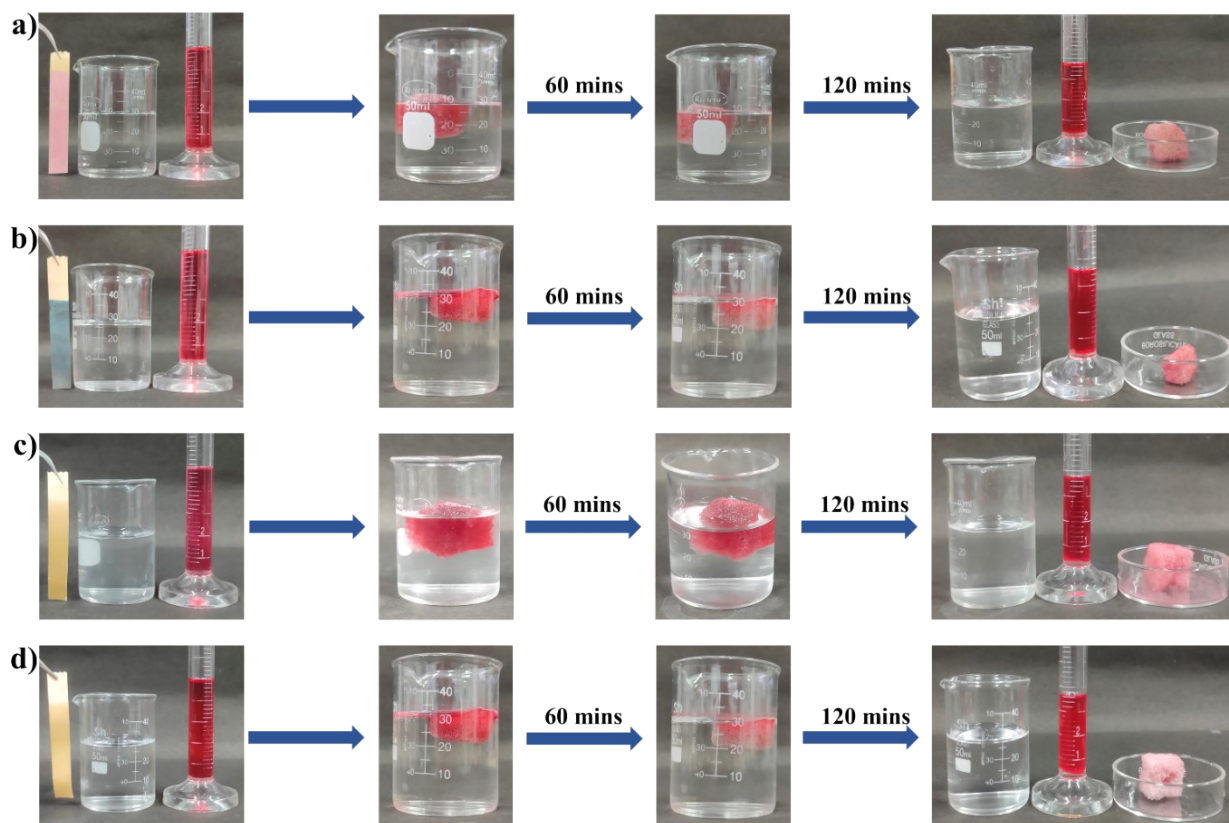

**Figure S14.** Photographs showing the floatability behaviour of O-Ph-POSS-FG@Sponge (a) acidic, (b) alkaline, (c) sea water and (d) normal water.

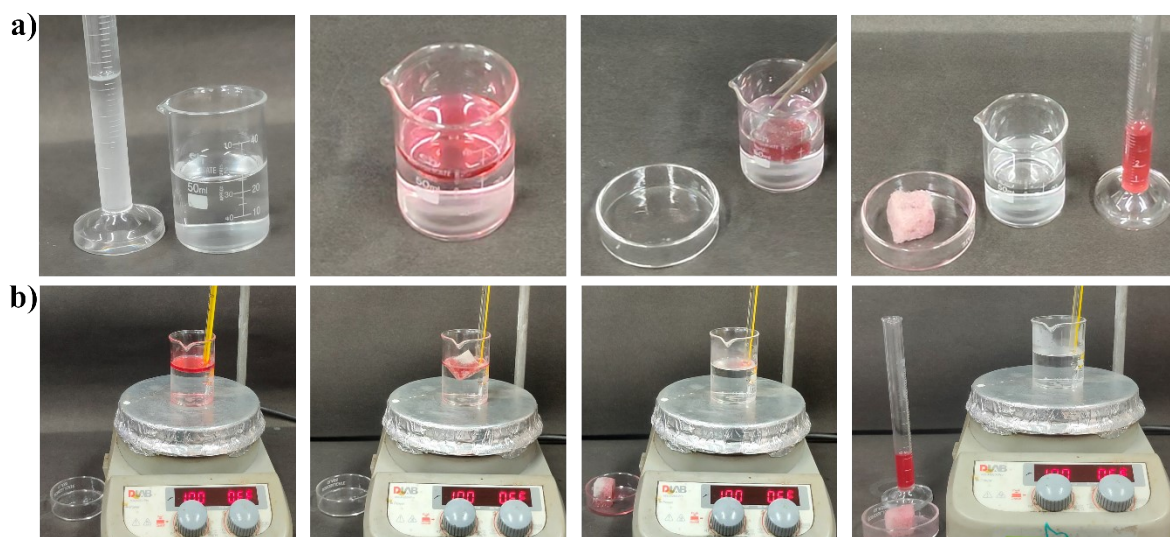

**Figure S15.** Toluene/water separation (a) supercool condition at  $-40\text{ }^{\circ}\text{C}$  and (b) superheat condition at  $100\text{ }^{\circ}\text{C}$ .



**Table S2.** Hydrophobicity, absorption capacities, and separation efficiency of various POSS and 2D-based hydrophobic materials comparison with present work.

| S. No | Material                                      | Water Contact Angle [°] | Absorption capacity | Separation efficiency | Application                                                             | Ref |
|-------|-----------------------------------------------|-------------------------|---------------------|-----------------------|-------------------------------------------------------------------------|-----|
| 1     | ODT-POSS-CT fabric membrane                   | 144                     | 1600-4800 wt%       | -                     | Hydrophobic cotton fabric ODT-POSS-CT membrane for oil-water separation | 2   |
| 2     | P(MMA-SMA-MAPOSS)                             | 153                     | -                   | 99 %                  | Oil-water separation                                                    | 3   |
| 3     | OV-POSS@MF                                    | 141                     | -                   | -                     | Oil-water separation performance                                        | 4   |
| 4     | TiO <sub>2</sub> -SH-POSS@CT                  | 157.6                   | -                   | 99 %                  | Self-cleaning and Oil-water separation                                  | 5   |
| 5     | POSS/PDMS modified polyacrylate               | 161                     | -                   | >97%                  | Oil-water separation, Self-cleaning and antifouling                     | 6   |
| 6     | POSS-modified Luffa sponge                    | 155                     | -                   | -                     | Oil absorption from water                                               | 7   |
| 7     | Ph-POSS@HKUST-1                               | 137±4                   | 130-480 wt%         | >96                   | Oil-water separation                                                    | 8   |
| 8     | PIM-1/POSS                                    | 155                     | -                   | 99 %                  | Oil-water separation and cleanup of oil soluble contaminants            | 9   |
| 9     | POSS-MPTMS                                    | 142                     | 280 wt%             | 96%                   | Oil-water separation and self-cleaning process                          | 10  |
| 10    | ZIF-POSS                                      | 157                     | 540–860 wt%         | >99%                  | Reusable sorbent material for separation of organic liquids from water  | 11  |
| 11    | GO-ePOSS                                      | 145                     | -                   | -                     | Oil-water separation                                                    | 12  |
| 12    | F-SQs-ECA-PU sponges (Fluoro silsesquioxanes) | >150                    | -                   | -                     | Oil-water separation and metal anticorrosion                            | 13  |

|    |                                                                        |                         |               |        |                                                                                |              |
|----|------------------------------------------------------------------------|-------------------------|---------------|--------|--------------------------------------------------------------------------------|--------------|
|    | with Ethyl Cyano Acrylate)                                             |                         |               |        |                                                                                |              |
| 13 | <i>f</i> -FG@ZIF-67 functionalized fluorinated graphene                | 140±1                   | 540–860 wt%.  | >99%   | Oil and organic solvent sorption                                               | 14           |
| 14 | HFGO@ZIF-8 composite Sponge@HFGO@ZIF-8                                 | 162                     | 150–600 wt%   | -      | Oil-water separation                                                           | 15           |
| 15 | FGO@Al-MOG                                                             | 125                     |               |        | Oil and organic solvent absorption and separation                              | 16           |
| 16 | FG-HKUST-1 composite sponge                                            | 130±3                   | -             | -      | Oil-water separation                                                           | 17           |
| 17 | FG supported ZIF-7 and ZIF-11 over stainless steel mesh & cotton cloth | 160±2<br>145±1<br>155±2 | -             | 94-98% | Percolation networks for selective permeation of oils and chlorinated solvents | 18           |
| 18 | O-Ph-POSS-FG@Sponge                                                    | 151±2                   | 1500-5500 wt% | 90-99% | Oil and organic water separation<br>Toluene-water Emulsion separation          | Present work |

### Supplementary Movies.

The videos of continuous separation for toluene (Video S1) and chloroform (Video S2) from solvent/water mixture by O-Ph-POSS-FG@Sponge were played at 2x speed.

### References

1. J. Wang, Y. Chen, Q. Xu, M. Cai, Q. Shi and J. Gao, *Sci. Rep.*, 2021, **11**, 11960.
2. T. C. Lin, J. S. Chang and D. J. Lee, *Int. J. Biol. Macromol.*, 2023, **253**, 126748.
3. D. Guo, K. Hou, S. Xu, Y. Lin, L. Li, X. Wen and P. Pi, *J. Mater. Sci.*, 2018, **53**, 6403–6413.
4. J. Chen, X. Zhang, L. Zhang, X. Jiang, F. Xiao, J. Hu and Ding, *J. Mol. Liq.*, 2024, **404**, 124941.
5. M. Yang, W. Liu, L. Liang, C. Jiang, C. Liu, Y. Xie, H. Shi, F. Zhang and K. Pi, *Cellulose*,

- 2020, **27**, 2847–2857.
6. J. Zhou, J. Yuan and L. Wang, *J. Mater. Sci.*, 2024, **59**, 55–72.
  7. Z. Wang, H. Ma, B. Chu and B. S. Hsiao, *Polymer*, 2017, **126**, 470–476.
  8. K. Dharmaraj, M. S. Kumar, N. Palanisami, M. Prakash, P. Loganathan and S. Shanmugan, *Dalton Trans.*, 2024, **53**, 13602–13616.
  9. C. Zhang, P. Li and B. Cao, *Ind. Eng. Chem. Res.*, 2015, **54**, 8772–8781.
  10. Y. Deng, D. Han, Y. Y. Deng, Q. Zhang, F. Chen and Q. Fu, *Chem. Eng. J.*, 2020, **379**, 122391.
  11. P. Loganathan, K. K. R. Datta and S. Shanmugan, *Inorg. Chem. Front.*, 2021, **8**, 2288–2298.
  12. Y. Liu, J. Zhou, E. Zhu, J. Tang, X. Liu and W. Tang, *Carbon*, 2015, **82**, 264–272.
  13. T. Zhang, Q. Ge and H. Liu, *ACS Appl. Eng. Mater.*, 2024, **2**, 215–223.
  14. R. Yogapriya and K. K. R. Datta, *J. Nanosci. Nanotechnol.*, 2020, **20**, 2930–2938.
  15. K. Jayaramulu, K. Kumara, R. Datta, C. Rçsler, M. Petr, M. Otyepka, R. Zboril and R. A. Fischer, *Angew. Chem.* 2016, **55**, 1178–1182.
  16. K. Jayaramulu, F. Geyer, M. Petr, R. Zboril, D. Vollmer and R.A. Fischer, *Adv. Mater.*, 2019, **31**, e1900820.
  17. R. Yogapriya and K. R. D. Kasibhatta, *ACS Appl. Nano Mater.*, 2020, **3**, 5816–5825.
  18. I. Prasanthi and K. K. R. Datta, *Inorg. Chem.*, 2023, **62**, 17791–17803.
